# Supplementary material
Source: ML conference proceedings conference paper supplement (https://openreview.net/forum?id=VoC3wF6fbh)
Supplement: supplementary_material [file attachment]

## 352 Appendix

### 353 A Reward Definitions

#### 354 A.1 Opening Rewards

The opening reward  $r_o$  is composed of the reward for opening the door to the target angle  $r_{od}$  along with rewards for manipulating the door handle denoted by  $r_{hm}$ . For pull doors, we additionally include a reward for encouraging the robot to move its base and end-effector around the door panel denoted by  $r_{adp}$ . These rewards together compose the opening reward

$$r_o = 3r_{od} + \begin{cases} r_{hm} & \theta < 30^\circ \\ \bar{r}_{hm} + 0.5r_{adp} & \text{otherwise} \end{cases}$$

355 When the door has been opened enough, set as  $\theta > 30^\circ$ ,  $r_{hm}$  is set to its maximum value  $\bar{r}_{hm}$  as it  
 356 is no longer necessary for the policy to interact with the handle to open the door further.  $r_{adp}$  is only  
 357 applied once the door has been opened enough.

The handle manipulation reward is composed of the following components

$$r_{hm} = r_{ehd} + r_{th} + r_{eho} + 0.5r_{hg} + r_{plg}$$

358 All individual reward terms in  $r_o$  are defined as follows.

- $r_{ehd}$  (end-effector to handle): Minimizes the distance between the end-effector point  $\mathbf{e}$  and the handle point  $\mathbf{h}$ :

$$r_{ehd} = \exp(-\|\mathbf{e} - \mathbf{h}\|_2)$$

- $r_{th}$  (turn handle): Rewards increasing the handle turning angle  $\phi$ :

$$r_{th} = \phi / \phi_{\max}$$

359 where  $\phi_{\max}$  is the maximum the handle can be turned.

- $r_{eho}$  (end-effector grasp orientation): Rewards the end-effector for tracking a desired orientation for grasping the handle.

$$r_{eho} = 1 - \frac{|e_o|}{\pi}$$

360 where  $e_o$  angular error between the end-effector orientation and the desired end-effector orienta-  
 361 tion.

- $r_{hg}$  (handle in end-effector grasp): Give a binary reward when the handle point  $\mathbf{h}$  is within the grasp zone  $\mathcal{G}$  of the end-effector.

$$r_{hg} = \begin{cases} \mathbf{1}_{\mathcal{G}}(\mathbf{h}) & \|\mathbf{e} - \mathbf{h}\|_2 \leq 1 \\ 0 & \text{otherwise} \end{cases}$$

362  $\mathbf{1}_{\mathcal{A}}(x)$  is the indicator function of value 1 if  $x \in \mathcal{A}$  and 0 otherwise. For the hook-end effector  
 363 used in this work, we defined the grasp zone  $\mathcal{G}$  as the region along the opening of the hook. This  
 364 reward is only active when the end-effector point  $\mathbf{e}$  is close enough to the handle (within 1 m).

- $r_{plg}$  (penalize lost grasp): Give a binary penalty when if the handle point  $\mathbf{h}$  is in the grasp zone at step  $t - 1$  and leaves the grasp zone at  $t$ .

$$r_{plg} = \begin{cases} -\mathbf{1}_{\mathcal{G}}(\mathbf{h}_{t-1})(1 - \mathbf{1}_{\mathcal{G}}(\mathbf{h}_t)) & \|\mathbf{e} - \mathbf{h}\|_2 \leq 1 \\ 0 & \text{otherwise} \end{cases}$$

365 Similar to  $r_{hg}$ ,  $r_{plg}$  is only active when the end-effector is close enough to the handle.

- $r_{od}$  (open door to target angle): Rewards opening the door to the target opening angle  $\bar{\theta}$

$$r_{od} = 1 - \frac{|\theta - \hat{\theta}|}{\hat{\theta}}$$

366 where  $\theta$  is the door hinge joint angle. This reward can also be used to train an opening only policy  
 367 that opens the door to  $\theta$ . For training the opening and passing through policy  $\theta$  is set to  $75^\circ$ .

- $r_{adp}$  (move around the door panel): This reward is only applied for pull doors. Given zones  $\mathcal{Z}_1$  and  $\mathcal{Z}_2$  defined relative to the door panel as shown in Fig 4,  $r_{adp}$  is computed based on the locations of the base  $\mathbf{b}$  and the end-effector  $\mathbf{e}$  as

$$r_{adp} = \begin{cases} 1 & \mathbf{b} \in \mathcal{Z}_1 \\ 2 & \mathbf{b} \in \mathcal{Z}_2 \\ 0 & \text{otherwise} \end{cases} + \begin{cases} 1 & \mathbf{e} \in \mathcal{Z}_1 \\ 2 & \mathbf{e} \in \mathcal{Z}_2 \\ 0 & \text{otherwise} \end{cases}$$

## 369 A.2 Passing Rewards

- $r_p$  (passing progress): Rewards the base velocity  $\mathbf{v}_B$  for moving along the unit progress vector  $\mathbf{p}$

$$r_p = \max \left( 1, \frac{\mathbf{p} \cdot \mathbf{v}_B}{\|\mathbf{v}_B\|_{\max}} \right)$$

370 where  $\|\mathbf{v}_B\|_{\max}$  is the the max allowable commanded velocity of the locomotion controller.

## 371 A.3 Shaping Rewards

The shaping reward  $r_s$  is defined as

$$r_s = 0.3r_{ma} + 0.5r_{pbt} + r_{psa} + 0.1r_{pcl} + 2r_{pc}$$

372 Individual terms of  $r_s$  are defined as:

- $r_{ma}$  (minimize arm motion): Rewards minimizing the arm joint velocities and accelerations

$$r_{ma} = \sum_{i=1}^6 \exp(0.01\dot{q}_i^2) + \exp(0.000001\ddot{q}_i^2)$$

373 where  $\dot{q}_i$  and  $\ddot{q}_i$  are the joint velocity and acceleration for the  $i^{th}$  arm joint respectively.

- $r_{pbt}$  (penalize base tilt): Penalizes large tilt of the robot base. The base tilt angle  $\psi$  can be computed from the projected gravity vector expressed in the robot base frame  $\mathbf{g}_B$  and expressed in the world frame  $\mathbf{g}_W$  as follows

$$\psi = \arccos \left( \frac{\mathbf{g}_W \cdot \mathbf{g}_B}{\|\mathbf{g}_W\| \|\mathbf{g}_B\|} \right)$$

374 Then  $r_{pbt} = -1$  if  $\psi > \bar{\psi}$ , where  $\bar{\psi}$  is a tilt threshold, and 0 otherwise. We set  $\bar{\psi}$  as  $8^\circ$ .

- $r_{psa}$  (penalize stretched arm): Penalize the arm from reaching out too far to prevent singular arm configurations.

$$r_{psa} = -\text{clip} \left( \frac{\|\mathbf{e} - \mathbf{s}\| - (0.7 - 0.1)}{0.1}, 0, 1 \right)$$

375 where  $\mathbf{e}$  and  $\mathbf{s}$  are the locations of the end-effector and shoulder joint.

- $r_{pcl}$  (penalize command out of limits): As the arm PD target and locomotion commands are clipped within certain bounds we penalize the policy for commands that exceed these bounds.

$$r_{pcl} = -\sum_{i=1}^9 \text{clip} \left( \frac{|a_i| - \bar{a}_i}{\sigma_i}, 0, 1 \right)$$

376 where  $a_i$ ,  $\bar{a}_i$ , and  $\sigma_i$  corresponding to the action, action limit, and penalty ramp up speed for the  
377  $i^{th}$  component of the policy's output action. The action limits are discussed in Sec. 3.0.2.

- $r_{pc}$  (penalize collisions): Penalizes robot collisions.

$$r_{pc} = -\sum_{c \in \mathcal{C}} \left( \begin{cases} 1 & \|\lambda_c\| > 0 \\ 0 & \text{otherwise} \end{cases} \right)$$

379 where  $\lambda_{(\cdot)}$  is the contact force on robot link  $(\cdot)$  and  $\mathcal{C}$  is the set of robot links where collisions are  
380 penalized including the base, thighs, and arm.

## B Domain Randomization Parameters

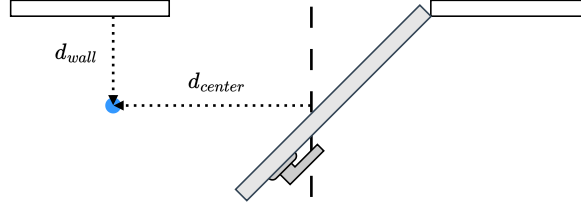

Figure 11: The initial robot location relative to the door is determined at the beginning of each episode by sampling  $d_{wall}$  and  $d_{center}$ .

The following randomizations are resampled for each new episode:

- Initial Base Location: Set relative to the doorway by the distances  $d_{wall}$  and  $d_{center}$  as shown in Fig. 11.  $d_{wall}$  and  $d_{center}$  are sampled uniformly from  $[1, 2]$  m and  $[-2, 2]$  m respectively.
- Initial Base Yaw: We define a yaw of  $0^\circ$  as the robot facing forwards along the direction of the doorway. The initial yaw is sampled uniformly from  $[-180, 180]^\circ$ .
- Initial Base Velocity: The initial base velocity components  $v_x$  and  $v_y$  are sampled uniformly from  $[-0.5, 0.5]$  m/s.
- Door Panel Mass: Sampled uniformly from  $[15, 75]$  kg.
- Door Hinge Resistance Torque: Sampled uniformly from  $[0, 30]$  Nm, set to 0 with probability 0.2.
- Door Handle Resistance Torque: Sampled uniformly from  $[0, 3]$  Nm, set to 0 with probability 0.2.
- Door Hinge Damping Torques: The hinge damping torque comprises of the air resistance given by  $K_d^{ar}\dot{\theta}^2$  and the door closer mechanism damping given by  $K_d^{dc}\dot{\theta}$ . We sample  $K_d^{ar}$  uniformly from  $[0, 4]$  Nms<sup>2</sup>. For most doors, the door closer's damping is tuned to prevent the door from closing too quickly. To model this, we set  $K_d^{dc}$  to be some multiple  $\alpha$  of the hinge resistance torque, where  $\alpha$  is sampled uniformly from  $[1.5, 3]$  s. The hinge damping torque is set to 0 with probability 0.4.
- Maximum Handle Turning Angle: Sampled uniformly from  $[15, 90]^\circ$ .
- Arm Joint Proportional Gain: Sampled uniformly from  $[40, 60]$ .
- Arm Joint Damping Gain: Sampled uniformly from  $[3, 6]$ .

We generated door models with different dimensions that are loaded into the simulation during initialization. The randomized door dimensions are shown in Fig. 12.

- $d_W$ : Sampled uniformly from  $[0.8, 1.0]$  m.
- $d_T$ : Sampled uniformly from  $[0.02, 0.06]$  m.
- $h_L$ : Sampled uniformly from  $[0.08, 0.12]$  m.
- $h_H$ : Sampled uniformly from  $[0.7, 1.3]$  m.
- $h_O$ : Sampled uniformly from  $[0.03, 0.12]$  m.

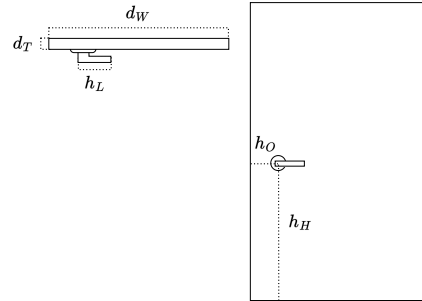

Figure 12: Randomized dimensions of the door and handle.
